# Supplementary material
Source: publisher site journal article supplement (https://www.dovepress.com/get_supplementary_file.php?f=501953.docx)
Supplement: Supplementary file 1 [file get_supplementary_file.php]

Supplementary Table 1.

Participant characteristics at baseline before treatment

|  |  | type 1 or 2 MNV  (n = 36) | PCV  (n = 25) | type 3 MNV  (n = 2) | Total  (n = 63) | *p* value |
| --- | --- | --- | --- | --- | --- | --- |
| Sex | Men | 26 (72%) | 19 (76%) | 0 (0%) | 45 (70%) | 0.081 |
|  | Women | 10 (28%) | 6 (24%) | 2 (100%) | 18 (30%) |
| Age |  | 76.6 ± 1.6 | 74.0 ± 1.5 | 55.0 | 74.8 ± 1.2 | 0.002* |
| Medical History | Diabetes | 5 (14%) | 6 (24%) | 0 (0%) | 11 (18%) | 0.48 |
|  | Hypertension | 19 (53%) | 6 (24%) | 2 (100%) | 27 (47%) | 0.016* |
| Smoking History |  | 17 (47%) | 9 (36%) | 0 (20%) | 26 (46%) | 0.49 |
| Pretreatment BCVA (logMAR) |  | 0.39 ± 0.06 | 0.23 ± 0.06 | 0.40 ± 0.30 | 0.33 ± 0.04 | 0.23 |
| Pretreatment CMT (μm) |  | 324.9 ± 22.8 | 314.4 ± 17.6 | 531.5 ± 41.5 | 328.22 ± 15.54 | 0.034* |
| Pretreatment GLD (mm) |  | 3823.26 ± 260.4 | 3751.0 ± 421.2 | 2140.0 ± 520.0 | 3733.14 ± 225.4 | 0.39 |
| **p* < 0.05 ANOVA |  |  |  |  |  |  |

type 1 or 2 MNV = type 1and 2 macular neovascularization, typical age-related macular degeneration (tAMD); PCV = polypoidal choroidal vasculopathy; type 3 MNV = type 3 macular neovascularization, retinal angiomatous proliferation (RAP); BCVA = best-corrected visual acuity; CMT = central macular thickness; GLD = greatest linear dimension.
